# Supplementary material for: A Systems Biology Approach Reveals that Tissue Tropism to West Nile Virus Is Regulated by Antiviral Genes and Innate Immune Cellular Processes
Source: PLoS Pathog. 2013 Feb 7;9(2):e1003168. doi: 10.1371/journal.ppat.1003168 (PMC3567171; doi:10.1371/journal.ppat.1003168)
Supplement: Table S4 — Canonical pathways annotated in cytoscape enrichment map. Key for node identification in Figure 5. Table is organized by biological function followed by the node number, associated canonical pathway, and B-H P value. Canonical pathways depicted in italics are enriched in both WT infected spleens and livers. (PDF) [file ppat.1003168.s004.pdf]

**Table S4: Canonical pathways annotated in cytoscape enrichment map**

| <b>No.</b> | <b>Type I Interferon signaling</b>                                                       | <b>B-H <i>P</i> value</b> |
|------------|------------------------------------------------------------------------------------------|---------------------------|
| 1          | <i>Role of Pattern Recognition Receptors in Recognition of Bacteria and Viruses</i>      | 3.16E-14                  |
| 2          | <i>Activation of IRF by Cytosolic Pattern Recognition Receptors</i>                      | 1.70E-07                  |
| 3          | <i>Interferon Signaling</i>                                                              | 3.89E-06                  |
| 4          | <i>Toll-like Receptor Signaling</i>                                                      | 8.91E-03                  |
| 5          | <i>Role of PKR in Interferon Induction and Antiviral Response</i>                        | 4.79E-02                  |
| 6          | <i>Role of RIG-I-like Receptors in Antiviral Innate Immunity</i>                         | 8.13E-02                  |
| <b>No.</b> | <b>Innate cellular immune response</b>                                                   | <b>B-H <i>P</i> value</b> |
| 1          | <i>Communication between Innate and Adaptive Immune Cells</i>                            | 2.14E-06                  |
| 2          | <i>Natural Killer Cell Signaling</i>                                                     | 3.39E-06                  |
| 3          | <i>Crosstalk between Dendritic Cells and Natural Killer Cells</i>                        | 2.40E-04                  |
| 4          | <i>Fcy Receptor-mediated Phagocytosis in Macrophages and Monocytes</i>                   | 1.26E-03                  |
| 5          | <i>Dendritic Cell Maturation</i>                                                         | 8.91E-03                  |
| 6          | <i>Production of Nitric Oxide and Reactive Oxygen Species in Macrophages</i>             | 4.57E-02                  |
| <b>No.</b> | <b>Adaptive cellular immune response</b>                                                 | <b>B-H <i>P</i> value</b> |
| 1          | <i>Allograft Rejection Signaling</i>                                                     | 1.07E-04                  |
| 2          | <i>Leukocyte Extravasation Signaling</i>                                                 | 5.50E-04                  |
| 3          | <i>T Helper Cell Differentiation</i>                                                     | 8.91E-03                  |
| 4          | <i>iCOS-iCOSL Signaling in T Helper Cells</i>                                            | 9.33E-03                  |
| 5          | <i>Cytotoxic T Lymphocyte-mediated Apoptosis of Target Cells</i>                         | 2.40E-02                  |
| 6          | <i>Graft-versus-Host Disease Signaling</i>                                               | 4.57E-02                  |
| 7          | <i>PKCθ Signaling in T Lymphocytes</i>                                                   | 4.57E-02                  |
| 8          | <i>CD28 Signaling in T Helper Cells</i>                                                  | 1.00E-01                  |
| <b>No.</b> | <b>Disease-specific signaling</b>                                                        | <b>B-H <i>P</i> value</b> |
| 1          | <i>Pathogenesis of Multiple Sclerosis</i>                                                | 1.26E-03                  |
| 2          | <i>Altered T Cell and B Cell Signaling in Rheumatoid Arthritis</i>                       | 1.26E-03                  |
| 3          | <i>Systemic Lupus Erythematosus Signaling</i>                                            | 1.07E-02                  |
| 4          | <i>Autoimmune Thyroid Disease Signaling</i>                                              | 3.39E-02                  |
| 5          | <i>Primary Immunodeficiency Signaling</i>                                                | 4.57E-02                  |
| 6          | <i>Colorectal Cancer Metastasis Signaling</i>                                            | 5.62E-02                  |
| 7          | <i>Role of Hypercytokinemia/hyperchemokine in the Pathogenesis of flu</i>                | 6.17E-02                  |
| <b>No.</b> | <b>Cytokine Signaling</b>                                                                | <b>B-H <i>P</i> value</b> |
| 1          | <i>TREM1 Signaling</i>                                                                   | 6.17E-07                  |
| 2          | <i>NF-κB Signaling</i>                                                                   | 1.02E-02                  |
| 3          | <i>Diff. Regulation of Cytokines in Intestinal Epithelial Cells by IL-17A and IL-17F</i> | 2.40E-02                  |
| 4          | <i>Diff. Regulation of Cytokine in Macrophages and Th Cells by IL-17A and IL-17F</i>     | 8.00E-02                  |
| <b>No.</b> | <b>Cell Stress and Injury</b>                                                            | <b>B-H <i>P</i> value</b> |
| 1          | <i>Cell Cycle: G2/M DNA Damage Checkpoint Regulation</i>                                 | 1.74E-02                  |
| 2          | <i>Mitotic Roles of Polo-Like Kinase</i>                                                 | 1.74E-02                  |
| <b>No.</b> | <b>Humoral immune response</b>                                                           | <b>B-H <i>P</i> value</b> |
| 1          | <i>Fc Epsilon RI Signaling</i>                                                           | 9.33E-03                  |
| 2          | <i>PI3K Signaling in B Lymphocytes</i>                                                   | 3.39E-02                  |
| <b>No.</b> | <b>Cell Growth</b>                                                                       | <b>B-H <i>P</i> value</b> |
| 1          | <i>Role of BRCA1 in DNA Damage Response</i>                                              | 4.79E-02                  |
| 2          | <i>Cdc42 Signaling</i>                                                                   | 8.13E-02                  |
| <b>No.</b> | <b>Intracellular secondary messenger signaling</b>                                       | <b>B-H <i>P</i> value</b> |
| 1          | <i>Sphingosine-1-phosphate Signaling</i>                                                 | 8.13E-02                  |
